# Supplementary material for: Single-crystalline MoO3 nanoplates: topochemical synthesis and enhanced ethanol-sensing performance
Source: Royal Society of Chemistry journal article supplement (doi:10.1039/c1jm11447f), 2011-01-01
Supplement: c1jm11447f.pdf [file c1jm11447f.pdf]

## Supporting Information

# Single-crystalline MoO<sub>3</sub> nanoplates: topochemical synthesis and the enhanced ethanol-sensing performance

*Deliang Chen,<sup>\*,a,b</sup> Minna Liu,<sup>a</sup> Li Yin,<sup>a</sup> Tao Li,<sup>a</sup> Zhen Yang,<sup>a,§</sup> Xinjian Li,<sup>b</sup> Bingbing Fan,<sup>a</sup> Hailong Wang,<sup>a</sup> Rui Zhang,<sup>a,c</sup> Zhengxin Li,<sup>a,d</sup> Hongxia Lu,<sup>a</sup> Hongliang Xu,<sup>a</sup> Daoyuan Yang,<sup>a</sup> Jing Sun,<sup>e</sup> Lian Gao<sup>e</sup>*

<sup>a</sup> School of Materials Science and Engineering, Zhengzhou University, 100 Science Road, Zhengzhou 450001, P. R. China.

<sup>b</sup> School of Physics and Engineering, Zhengzhou University, 100 Science Road, Zhengzhou 450001, P. R. China

<sup>c</sup> Laboratory of Aeronautical Composites, Zhengzhou Institutes of Aeronautical Industry Management, University Centre, Zhengdong New District, Zhengzhou 450046, P. R. China

<sup>d</sup> School of Materials Science and Engineering, Henan University of Technology, 195 Zhongyuan West Road, Zhengzhou 450007, P. R. China

<sup>e</sup> The State Key Laboratory of High Performance Ceramics and Superfine Microstructure, Shanghai Institute of Ceramics, Chinese Academy of Sciences, 1295 Dingxi Road, Shanghai 200050, P. R. China

<sup>§</sup> Present address: Institute of Metal Research, Chinese Academy of Sciences, 72 Wenhua Road, Shenyang 110016, P.R. China

\*Corresponding author: dlchen@zzu.edu.cn (D. L. Chen)

**Table s1.** Comparison of  $I_{(0\bar{1}0)} / I_{(111)}$  values of the as-obtained  $\alpha$ -MoO<sub>3</sub> nanocrystals and the literature data (JCPDS card No. 05-0508) on the basis of XRD results.

| Sample            | $I_{(020)} / I_{(111)}$ | $I_{(040)} / I_{(111)}$ | $I_{(060)} / I_{(111)}$ |
|-------------------|-------------------------|-------------------------|-------------------------|
| This work         | 1.465                   | 2.641                   | 1.631                   |
| JCPDS No. 05-0508 | 0.971                   | 1.743                   | 0.886                   |

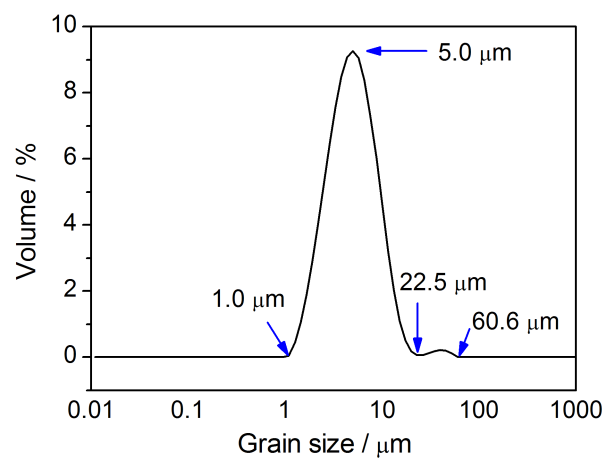

**Fig. S1.** The laser diffraction size-distribution curve of the as-obtained  $\alpha$ - $\text{MoO}_3$  nanoplates.
